# Supplementary material for: Role of MicroRNA Modulation in the Interferon-α/Ribavirin Suppression of HIV-1 In Vivo
Source: PubMed Central journal article supplement (PMC4183579; doi:10.1371/journal.pone.0109220), 2014-10-02

Figure S1.

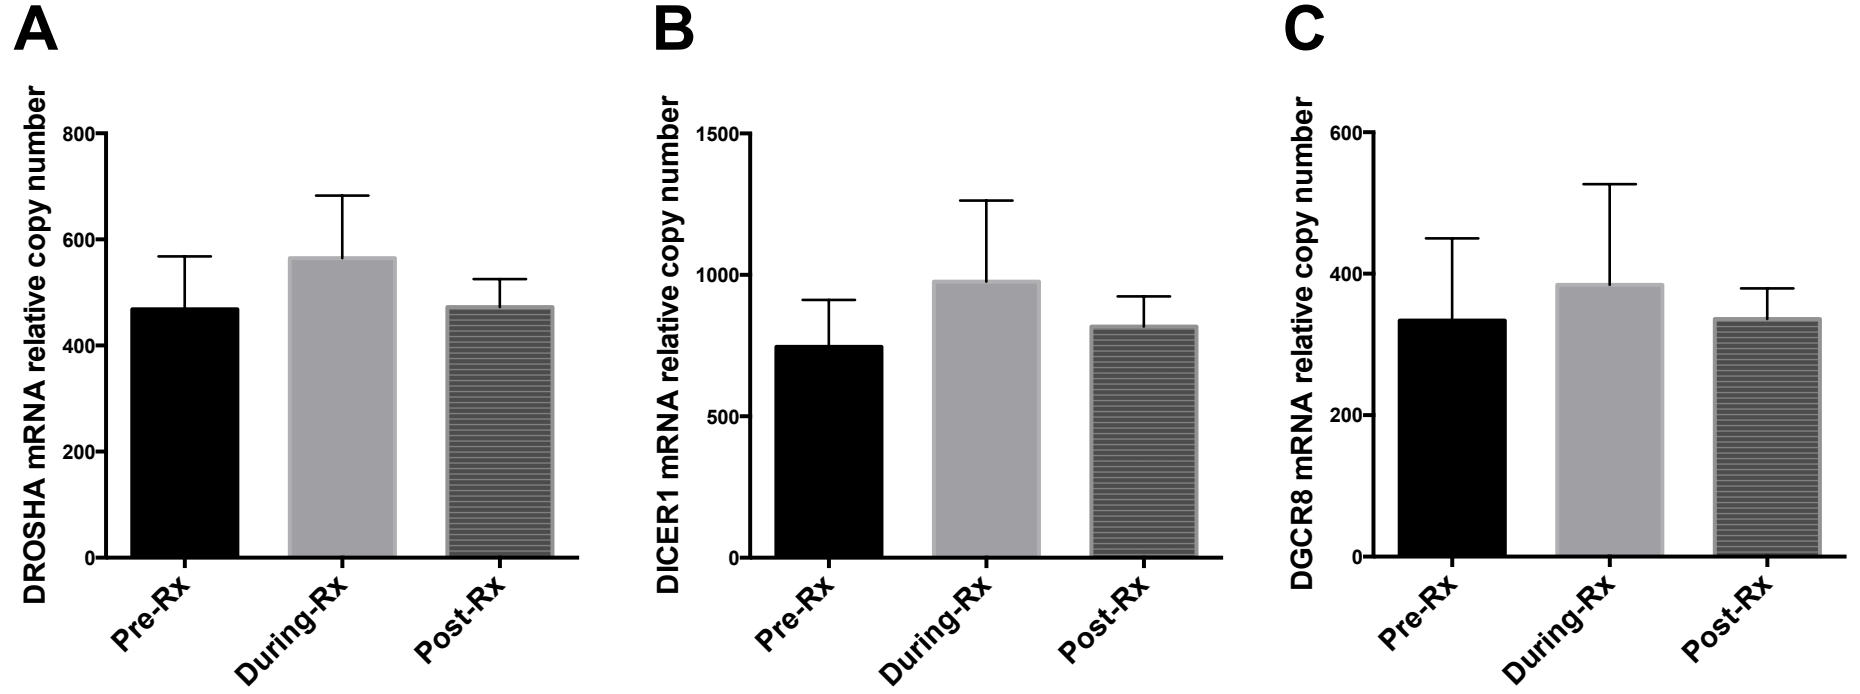

Supplement: pone.0109220.s001.pdf [file pone.0109220.s001.pdf]
