# Supplementary material for: Role of MicroRNA Modulation in the Interferon-α/Ribavirin Suppression of HIV-1 In Vivo
Source: PubMed Central journal article supplement (PMC4183579; doi:10.1371/journal.pone.0109220), 2014-10-02
Supplement: pone.0109220.s002.pdf [file pone.0109220.s002.pdf]

**Table S1.** SHCS subject characteristics at baseline (pre IFN- $\alpha$ /RBV treatment).

| Individual | Gender | Age | Risk group <sup>1</sup> | CDC disease stage <sup>2</sup> | Viral load pre-treatment (copies/ml) |           | Viral load during-treatment (copies/ml) |           | Viral load post-treatment (copies/ml) |         | CD4+ count (cells/ $\mu$ l) | HIV-1 subtype <sup>3</sup> | IFN- $\alpha$ /RBV sample <sup>4</sup> |
|------------|--------|-----|-------------------------|--------------------------------|--------------------------------------|-----------|-----------------------------------------|-----------|---------------------------------------|---------|-----------------------------|----------------------------|----------------------------------------|
|            |        |     |                         |                                | HIV-1                                | HCV       | HIV-1                                   | HCV       | HIV-1                                 | HCV     |                             |                            |                                        |
| A          | M      | 38  | IDU                     | A                              | 43,200                               | 500,000   | 11,400                                  | 0         | N/A <sup>5</sup>                      | N/A     | 404                         | B                          | 52.1                                   |
| B          | M      | 45  | OTHER                   | B                              | 55,215                               | 2,490,000 | 6,322                                   | 2,980,000 | 29,857                                | N/A     | 270                         | B                          | 13.6                                   |
| C          | M      | 42  | MSM                     | A                              | 78,886                               | 9.9E+11   | 18,902                                  | 20        | 474,255                               | 0       | 587                         | B                          | 25.7                                   |
| D          | F      | 26  | HET                     | A                              | 13,100                               | 700,000   | 10,986                                  | 0         | 15,072                                | 461,701 | 374                         | B                          | 48.6                                   |
| E          | M      | 28  | HET                     | A                              | 167,500                              | 1,255,000 | 22,200                                  | 0         | 101,000                               | 0       | 501                         | B                          | 26.6                                   |
| I          | M      | 32  | MSM                     | A                              | 4,070                                | 2,310,000 | 346                                     | 0         | 17,700                                | N/A     | 755                         | B                          | 47.7                                   |
| J          | M      | 39  | IDU                     | A                              | 8,620                                | 2,760,116 | 1,376                                   | 0         | 13,200                                | 140,349 | 590                         | B                          | 47.6                                   |

<sup>1</sup> Risk groups are defined as follows: HET = heterosexual, IDU = intravenous drug use, MSM = men who have sex with men.

<sup>2</sup> CDC disease stage is defined as follows: A = asymptomatic, acute infection or persistent generalized lymphadenopathy, B = symptomatic conditions, C = AIDS-indicator conditions.

<sup>3</sup> HIV-1 subtype was determined by applying the REGA subtyping algorithm to *pol* sequences (previously generated for drug resistance genotyping)

<sup>4</sup> Weeks post-initiation of IFN- $\alpha$ /RBV treatment that the on-treatment sample was collected.

<sup>5</sup> N/A = Not available
