# Supplementary material for: Role of MicroRNA Modulation in the Interferon-α/Ribavirin Suppression of HIV-1 In Vivo
Source: PubMed Central journal article supplement (PMC4183579; doi:10.1371/journal.pone.0109220), 2014-10-02
Supplement: pone.0109220.s003.pdf [file pone.0109220.s003.pdf]

**Table S2.** List of microRNAs modulated by IFN- $\alpha$ /RBV with p value < 0.05 (pre Rx/during Rx).

|             | Log mean pre Rx | Log mean dur Rx | Log mean pos Rx | Log fold (pre Rx/during Rx) | p value (pre Rx/during Rx) | FDR value (pre Rx/during Rx) | Previously associated with HIV? Y/N [ref] |
|-------------|-----------------|-----------------|-----------------|-----------------------------|----------------------------|------------------------------|-------------------------------------------|
| miR-422a    | -12.27          | -13.91          | -13.21          | 1.64                        | 0.0001                     | 0.037                        | N                                         |
| miR-33a#    | -9.67           | -10.85          | -10.53          | 1.18                        | 0.001                      | 0.14                         | N                                         |
| miR-454#    | -10.03          | -10.88          | -10.39          | 0.85                        | 0.002                      | 0.14                         | N                                         |
| miR-15b#    | -5.67           | -6.64           | -6.37           | 0.97                        | 0.002                      | 0.14                         | Y [1]                                     |
| miR-1271    | -7.66           | -8.89           | -8.18           | 1.23                        | 0.003                      | 0.14                         | N                                         |
| miR-26b#    | -8.27           | -9.70           | -9.16           | 1.43                        | 0.003                      | 0.14                         | N                                         |
| miR-942     | -7.39           | -7.99           | -7.78           | 0.60                        | 0.004                      | 0.16                         | N                                         |
| miR-200c    | -5.87           | -6.34           | -5.94           | 0.47                        | 0.01                       | 0.19                         | N                                         |
| miR-106b#   | -6.69           | -7.52           | -7.61           | 0.83                        | 0.01                       | 0.19                         | N                                         |
| miR-378     | -7.52           | -8.63           | -8.53           | 1.12                        | 0.01                       | 0.19                         | Y [2]                                     |
| miR-186     | -0.98           | -1.23           | -0.89           | 0.25                        | 0.01                       | 0.19                         | N                                         |
| miR-181a-2# | -7.76           | -8.80           | -8.82           | 1.04                        | 0.01                       | 0.19                         | Y [3]                                     |
| miR-34a     | -8.82           | -7.79           | -9.42           | -1.03                       | 0.01                       | 0.19                         | Y [4]                                     |
| miR-26a     | -10.82          | -11.83          | -11.26          | 1.02                        | 0.01                       | 0.19                         | Y [5]                                     |
| miR-27a#    | -5.56           | -6.56           | -6.43           | 1.00                        | 0.01                       | 0.19                         | Y [6]                                     |
| miR-577     | -12.66          | -13.75          | -12.73          | 1.09                        | 0.01                       | 0.19                         | N                                         |
| miR-708     | -10.76          | -12.36          | -12.42          | 1.60                        | 0.01                       | 0.19                         | N                                         |
| miR-30d#    | -10.48          | -11.67          | -11.10          | 1.19                        | 0.01                       | 0.19                         | Y [6]                                     |
| miR-146a    | 2.11            | 1.70            | 2.09            | 0.41                        | 0.01                       | 0.19                         | Y [7]                                     |
| miR-625#    | -4.47           | -5.35           | -4.70           | 0.87                        | 0.01                       | 0.19                         | N                                         |
| miR-425#    | -7.54           | -8.90           | -8.37           | 1.36                        | 0.01                       | 0.19                         | N                                         |

|            |        |        |        |       |       |      |       |
|------------|--------|--------|--------|-------|-------|------|-------|
| miR-345    | -3.79  | -4.38  | -4.48  | 0.60  | 0.02  | 0.21 | N     |
| miR-629    | -7.94  | -8.46  | -8.22  | 0.53  | 0.02  | 0.21 | N     |
| miR-941    | -10.15 | -11.16 | -11.57 | 1.00  | 0.02  | 0.22 | N     |
| rno-miR-7# | -2.65  | -3.16  | -2.96  | 0.51  | 0.02  | 0.22 | N     |
| miR-340#   | -6.20  | -7.00  | -7.08  | 0.80  | 0.02  | 0.23 | N     |
| miR-212    | -9.18  | -9.90  | -9.66  | 0.72  | 0.02  | 0.23 | N     |
| miR-24     | 1.80   | 1.45   | 1.47   | 0.35  | 0.02  | 0.23 | Y [6] |
| miR-378    | -11.40 | -12.04 | -12.84 | 0.64  | 0.02  | 0.24 | N     |
| miR-192#   | -12.44 | -13.04 | -12.90 | 0.60  | 0.03  | 0.24 | N     |
| miR-144#   | -8.93  | -6.81  | -8.98  | -2.11 | 0.03  | 0.24 | N     |
| miR-598    | -8.02  | -8.60  | -8.20  | 0.58  | 0.03  | 0.26 | N     |
| miR-363    | -9.26  | -8.68  | -9.56  | -0.58 | 0.03  | 0.27 | N     |
| miR-451    | -6.43  | -4.12  | -6.45  | -2.30 | 0.03  | 0.27 | Y [6] |
| miR-744#   | -10.55 | -10.79 | -11.30 | 0.24  | 0.03  | 0.27 | N     |
| miR-486-5p | -8.32  | -6.86  | -8.61  | -1.46 | 0.03  | 0.27 | N     |
| miR-590-3p | -6.93  | -7.93  | -7.57  | 1.00  | 0.04  | 0.27 | N     |
| miR-532-5p | -4.46  | -4.90  | -5.17  | 0.44  | 0.04  | 0.27 | N     |
| miR-505#   | -10.26 | -10.95 | -11.09 | 0.69  | 0.04  | 0.27 | N     |
| miR-126#   | -3.58  | -4.46  | -4.28  | 0.88  | 0.04  | 0.27 | N     |
| miR-628-3p | -9.47  | -10.06 | -9.68  | 0.59  | 0.04  | 0.27 | N     |
| miR-213    | -8.78  | -9.54  | -9.98  | 0.76  | 0.04  | 0.27 | N     |
| miR-15a    | -4.63  | -5.18  | -5.14  | 0.56  | 0.04  | 0.27 | Y [5] |
| miR-664    | -4.63  | -5.12  | -4.74  | 0.49  | 0.04  | 0.28 | N     |
| miR-191    | 2.37   | 1.89   | 2.15   | 0.48  | 0.04  | 0.28 | Y [8] |
| miR-200a   | -10.67 | -11.57 | -11.33 | 0.90  | 0.049 | 0.31 | N     |

## REFERENCES:

1. Shen CJ, Jia YH, Tian RR, Ding M, Zhang C, Wang JH. Translation of Pur-alpha is targeted by cellular miRNAs to modulate the differentiation-dependent susceptibility of monocytes to HIV-1 infection. *FASEB J* 2012,**26**:4755-4764.
2. Hariharan M, Scaria V, Pillai B, Brahmachari SK. Targets for human encoded microRNAs in HIV genes. *Biochem Biophys Res Commun* 2005,**337**:1214-1218.
3. Fujii YR, Saksena NK. Viral Infection-Related MicroRNAs in Viral and Host Genomic Evolution. In: *RNA and the Regulation of Gene Expression: A Hidden Layer of Complexity*. Edited by Morris KV: Caister Academic Press; 2008.
4. Zhang HS, Chen XY, Wu TC, Sang WW, Ruan Z. MiR-34a is involved in Tat-induced HIV-1 long terminal repeat (LTR) transactivation through the SIRT1/NFkappaB pathway. *FEBS Lett* 2012,**586**:4203-4207.
5. Sun G, Li H, Wu X, Covarrubias M, Scherer L, Meinking K, *et al*. Interplay between HIV-1 infection and host microRNAs. *Nucleic Acids Res* 2012,**40**:2181-2196.
6. Houzet L, Yeung ML, de Lame V, Desai D, Smith SM, Jeang KT. MicroRNA profile changes in human immunodeficiency virus type 1 (HIV-1) seropositive individuals. *Retrovirology* 2008,**5**:118.
7. Rom S, Rom I, Passiatore G, Pacifici M, Radhakrishnan S, Del Valle L, *et al*. CCL8/MCP-2 is a target for mir-146a in HIV-1-infected human microglial cells. *FASEB J* 2010,**24**:2292-2300.
8. Tan Gana NHT, Victoriano AF, Hibi Y, Asamitsu K, Uranishi H, Okamoto T. Interactions of cellular microRNAs in HIV-1 latently infected cells. In: *19th International AIDS Conference*. Washington, DC; 2012.
